# 1 **Genomic landscape of drug response reveals** 2 **novel mediators of anthelmintic resistance**

3

4 **Authors:** Stephen R. Doyle<sup>1,†,\*</sup>, Roz Laing<sup>2,†,\*</sup>, David Bartley<sup>3</sup>, Alison Morrison<sup>3</sup>,  
5 Nancy Holroyd<sup>1</sup>, Kirsty Maitland<sup>2</sup>, Alistair Antonopoulos<sup>2</sup>, Umer Chaudhry<sup>4§</sup>, Ilona  
6 Flis<sup>2</sup>, Sue Howell<sup>5</sup>, Jennifer McIntyre<sup>2</sup>, John S. Gilleard<sup>6</sup>, Andy Tait<sup>2</sup>, Barbara Mable<sup>2</sup>,  
7 Ray Kaplan<sup>5+</sup>, Neil Sargison<sup>4</sup>, Collette Britton<sup>2</sup>, Matthew Berriman<sup>1</sup>, Eileen  
8 Devaney<sup>2,‡</sup>, James A. Cotton<sup>1,‡</sup>

9

10 † These authors contributed equally to this work

11 ‡ These authors contributed equally to this work

12 § Current address: School of Veterinary Medicine, University of Surrey; Surrey,  
13 United Kingdom

14 + Current address: Department of Pathobiology, School of Veterinary Medicine, St.  
15 George's University; St. George's, Grenada

16

17 \*Corresponding authors: email: [stephen.doyle@sanger.ac.uk](mailto:stephen.doyle@sanger.ac.uk); email:  
18 [Rosalind.Laing@glasgow.ac.uk](mailto:Rosalind.Laing@glasgow.ac.uk)

19

## 20 **Affiliations:**

- 21 1. Wellcome Sanger Institute; Hinxton, United Kingdom
- 22 2. Institute of Biodiversity Animal Health and Comparative Medicine, College of  
23 Medical, Veterinary and Life Sciences, University of Glasgow; Glasgow, United  
24 Kingdom
- 25 3. Moredun Research Institute; Penicuik, United Kingdom
- 26 4. Royal (Dick) School of Veterinary Studies, University of Edinburgh; Edinburgh,  
27 United Kingdom
- 28 5. Department of Infectious Diseases, College of Veterinary Medicine, University of  
29 Georgia; Athens, United States
- 30 6. Department of Comparative Biology and Experimental Medicine, Host-Parasite  
31 Interactions Program, Faculty of Veterinary Medicine, University of Calgary;  
32 Calgary, Canada

33

34 **Abstract:**

35 Understanding the genetic basis of anthelmintic drug resistance in parasitic  
36 nematodes is key to improving the efficacy and sustainability of parasite control.  
37 Here, we use a genetic cross in a natural host-parasite system to simultaneously  
38 map resistance loci for the three major classes of anthelmintics. This approach  
39 identifies novel alleles for resistance to benzimidazoles and levamisole and  
40 implicates the transcription factor, *cky-1*, in ivermectin resistance. This gene is  
41 within a locus under selection in ivermectin resistant populations worldwide;  
42 functional validation using knockout and gene expression experiments supports a  
43 role for *cky-1* overexpression in ivermectin resistance. Our work demonstrates the  
44 feasibility of high-resolution forward genetics in a parasitic nematode, and identifies  
45 variants for the development of molecular diagnostics to combat drug resistance in  
46 the field.

47

48 **One-Sentence Summary:**

49 Genetic mapping of known and novel anthelmintic resistance-associated alleles in a  
50 multi-drug resistant parasitic nematode

51 **Main Text:** Over a billion people and countless livestock and companion animals  
52 require at least annual treatment with anthelmintic drugs to control parasitic worm  
53 (helminth) infections. The rapid and widespread evolution of resistance to these  
54 drugs is a significant health concern in livestock (1) and places an economic burden  
55 on food production. Resistance is present on every continent where anthelmintics  
56 are used; in many places, individual drug classes are now ineffective, and some  
57 farms have resistance to every major class of drug (2), threatening the economic  
58 viability of livestock farming. In Europe, gastrointestinal helminths of livestock are  
59 responsible for annual production losses of €686 million, of which €38 million is  
60 associated with anthelmintic resistance (3). Drug resistance is also now a major  
61 concern in the treatment of helminths infecting dogs (4, 5), with multiple drug  
62 resistance to all major anthelmintic classes in the dog hookworm now common in  
63 the USA (6). The same classes of drugs to which veterinary parasites have rapidly  
64 evolved resistance are also used to control related human-infective helminths,  
65 which are targeted at scale by some of the largest preventative chemotherapy  
66 programmes in the world. Although less established in human-infective helminths,  
67 the emergence of widespread anthelmintic resistance – echoing the current global  
68 emergency around antimicrobial resistance – will have serious socio-economic and  
69 welfare impacts on people infected with parasitic worms and derail hard-won  
70 progress towards the proposed eradication and elimination of helminths over the  
71 next decade (7, 8).

72

73 Despite extensive efforts, the causal mutations and mechanisms of resistance in  
74 parasitic helminths remain largely unresolved. Many candidate "resistance genes"  
75 have been proposed for most drug classes; these candidates are primarily  
76 homologues of genes that confer resistance in the free-living model nematode  
77 *Caenorhabditis elegans*, and are subsequently assayed for differences in genetic  
78 variation and/or gene expression in parasite isolates that vary in their response to  
79 treatment (9–11). A successful example of this approach is the identification of  
80 variants of  $\beta$ -tubulin that inhibit tubulin-depolymerisation by benzimidazole-class  
81 anthelmintics (12, 13). These variants, particularly at amino acid positions 167, 198  
82 and 200 of  $\beta$ -tubulin isotype 1 (14–16), have subsequently been shown to be

83 associated with resistance in many parasitic species for which benzimidazoles have  
84 been extensively used, and a number of these parasite-specific mutations have  
85 been functionally validated in *C. elegans* (17, 18). However, these three variants are  
86 unlikely to explain all phenotypic variation associated with resistance (19, 20), and it  
87 is unknown to what degree other variants contribute to benzimidazole resistance in  
88 parasitic species. For other drug classes, few candidate genes have been  
89 functionally validated or shown to be important in natural parasite populations. For  
90 example, concurrent mutation of three glutamate-gated chloride channels (*glc-1*,  
91 *avr-14*, *avr-15*) enables resistance to high levels of ivermectin by *C. elegans* (21), yet  
92 no strong evidence of selection on these channels in any parasitic species has been  
93 demonstrated to date. On the one hand, the many genes proposed may reflect that  
94 resistance is a complex, quantitative trait where similar resistance phenotypes can  
95 be derived from variation in multiple loci. Alternatively, resistance may be species  
96 and/or population-specific, and evolve independently under subtly different  
97 selection pressures (22). However, some candidates are likely to have been falsely  
98 associated with resistance, as most studies present relatively weak genetic  
99 evidence from the analysis of single or few candidate loci in small numbers of  
100 helminth populations that often differ in both drug susceptibility and geographic  
101 origin. Many helminth species are exceptionally genetically diverse (23–26), and  
102 consequently, candidate gene approaches have limited power to disentangle causal  
103 variation from linked but unrelated background genetic variation, a situation that is  
104 exacerbated by the experimental intractability and inadequate genomic resources  
105 available for many parasitic helminths (9).

106

107 Here we describe a genome-wide forward genetics approach using the parasitic  
108 nematode *Haemonchus contortus* as a model to identify genetic variation  
109 associated with resistance to three of the most important broad-spectrum  
110 anthelmintic drugs globally: ivermectin, levamisole, and benzimidazole. *H. contortus*  
111 is an economically important gastrointestinal parasite of livestock and one of only a  
112 few genetically tractable parasites used for drug discovery (27, 28), vaccine  
113 development (29, 30), and anthelmintic resistance research (22). Our approach has  
114 exploited a genetic cross between the susceptible MHco3(ISE) and multi-drug

115 resistant MHco18(UGA) strains of *H. contortus* (**fig. S1 A**), allowing us to investigate  
116 resistance in a natural host-parasite system while controlling for confounding  
117 genetic diversity that differentiates parasite strains (see **Supplementary materials**  
118 regarding the establishment and validation of the cross). Using an eXtreme  
119 Quantitative Trait Locus (X-QTL) (31, 32) analysis framework, whereby pools of F3-  
120 generation progeny from F2 adults treated *in vivo* were sampled pre- and post-  
121 treatment for each drug (**fig. S1 B**; n = 3 parasite populations per drug class  
122 maintained in independent sheep; **fig. S2**) and analysed by whole-genome  
123 sequencing (**table S1**), we aimed to identify drug-specific quantitative trait loci  
124 (QTLs) associated with resistance throughout the genome. These QTLs and specific  
125 variants were independently validated using genome-wide variation from  
126 populations of *H. contortus* obtained from ten US farms of known resistance  
127 phenotype (see **Supplementary materials** for a description of the US farms and  
128 quantitative phenotyping; **table S2, fig. S3, fig. S4**), and from more than 350  
129 individual parasites sampled throughout the world where *H. contortus* is endemic  
130 (25, 33).

131  
132 A key feature and thus advantage of using a genetic cross to map anthelmintic  
133 resistance loci is that the high degree of within-strain diversity and genome-wide  
134 genetic divergence is controlled by admixture in the F1 generation of the cross. The  
135 susceptible and resistant parental *H. contortus* strains of the cross are highly  
136 genetically differentiated throughout their genomes (**Fig. 1A**; mean  $F_{ST} = 0.089 \pm$   
137  $0.066$  SD; n = 16,794,366 single nucleotide variant sites), typical of two parasite  
138 strains sampled from different continents (25, 34). In subsequent generations, both  
139 susceptible and resistant alleles segregate at moderate frequencies in the absence  
140 of selection, and genetic recombination breaks down the linked genetic variation  
141 that defines and differentiates the parental strains. This was evident by a  
142 significantly lower genome-wide genetic differentiation in the F3-generation control  
143 population (genome-wide mean  $F_{ST} = 0.012 \pm 0.004$ ) and absence of discrete peaks  
144 of high genetic differentiation (**Fig. 1B: Control**). In contrast, after each drug  
145 treatment, discrete QTLs that differ between each drug class were revealed: after  
146 benzimidazole treatment, we identified a major QTL on chromosome 1 (**Fig. 1B:**

147 **Benzimidazole**); after levamisole, two QTLs on chromosome 4 and 5 (**Fig. 1B:**  
148 **Levamisole**); and after ivermectin, a major QTL on chromosome 5 and minor QTLs  
149 on chromosomes 2 and 5 (**Fig. 1B: Ivermectin**).  
150

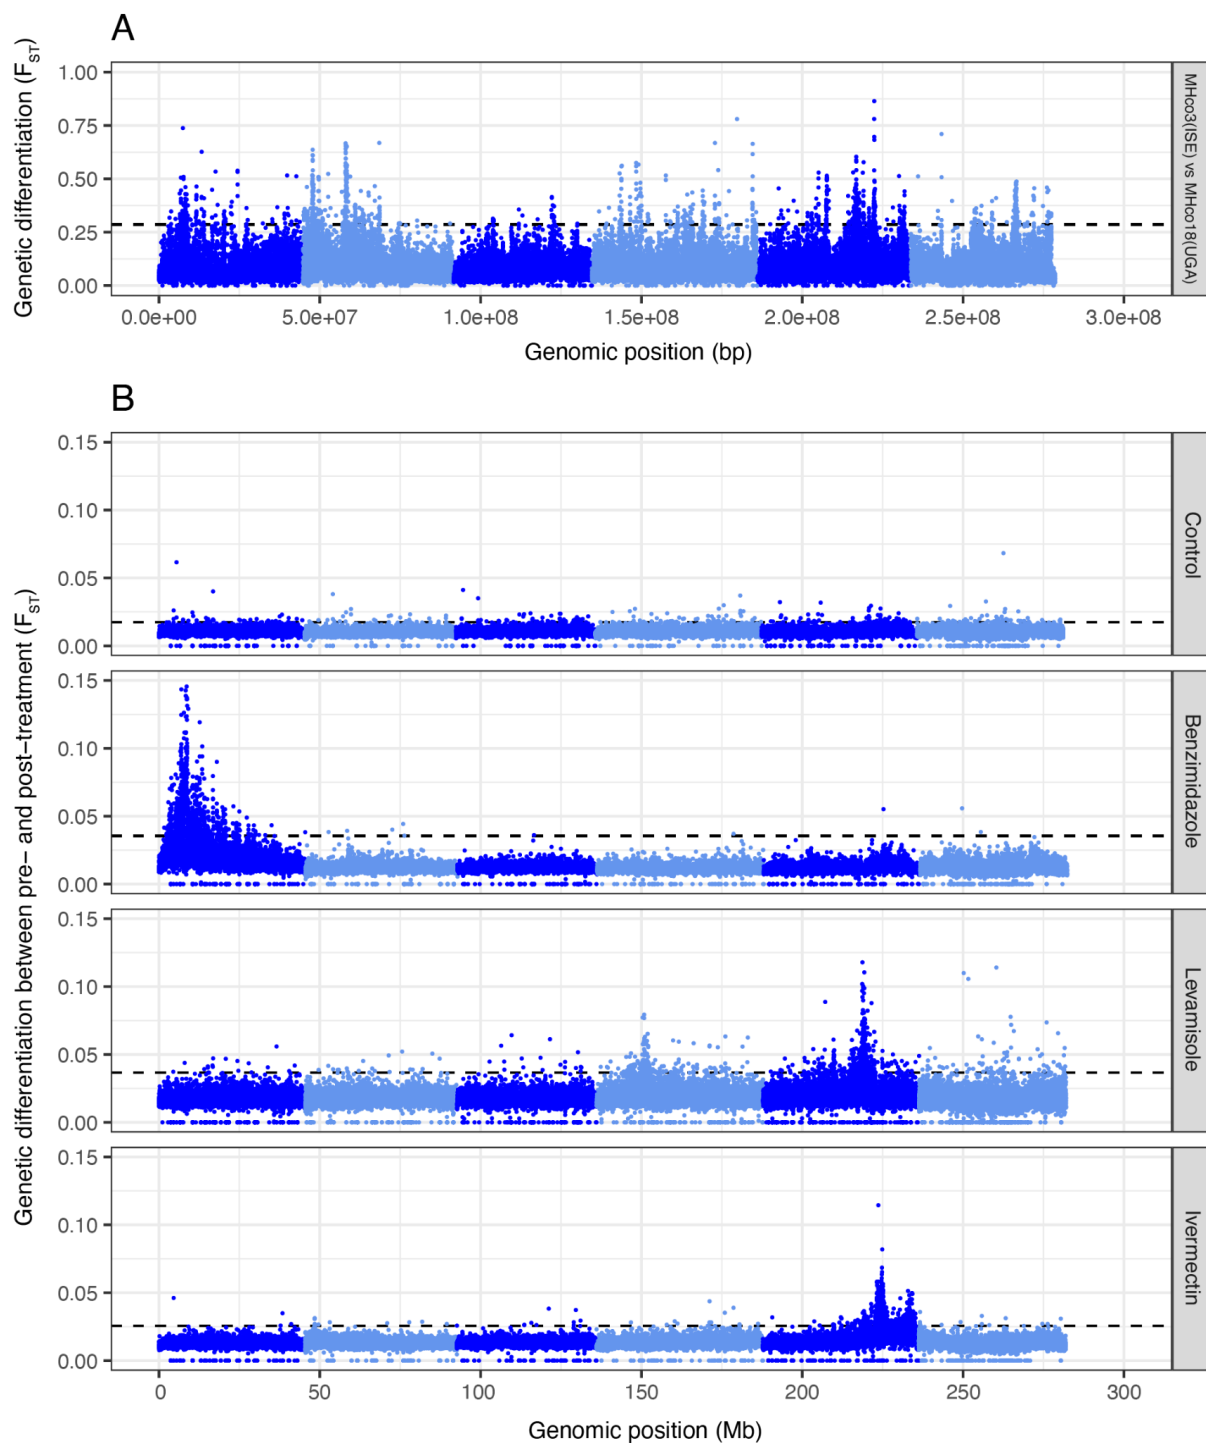

151

152

153 **Fig. 1. A genetic cross followed by drug selection reveals discrete QTLs associated**  
154 **with each anthelmintic drug class.**

155 (A) Genome-wide comparison of susceptible MHco3(ISE) and multidrug-resistant

156 MHco18(UGA) parental strains revealed broad-scale genetic differentiation on all

157 chromosomes. (B) Comparison of genome-wide differentiation between F3 generation

158 pooled infective-stage larvae ( $L_3$ ,  $n = 200$ ) sampled pre- and post-treatment revealed

159 distinct genomic regions or QTLs associated with benzimidazole, levamisole, and  
160 ivermectin drug treatment. An untreated control where sampling was time-matched to the  
161 treated groups is shown for comparison. In all plots, each point represents the mean  
162 genetic differentiation ( $F_{ST}$ ) from three biological replicates in five kb sliding windows, and  
163 the dashed line represents the genome-wide mean  $F_{ST} + 3$  SD for each comparison (See  
164 **fig. S2** for genome-wide replicate data). Individual chromosomes are indicated by  
165 alternating dark and light blue shading.

166

167

168

169 ***Variation at  $\beta$ -tubulin isotype 1 and a novel  $\beta$ -tubulin isotype 2 variant is***  
170 ***associated with high levels of benzimidazole resistance***

171 The  $\beta$ -tubulin isotype 1 (HCON\_00005260) gene and, in particular, nonsynonymous  
172 changes at coding positions 167, 198, and 200 have been widely associated with  
173 benzimidazole resistance in *H. contortus* (13, 15, 16, 35) and other nematodes  
174 frequently exposed to benzimidazole treatment (17, 36). After benzimidazole  
175 selection, a single broad QTL was found on chromosome 1 (**Fig. 2A**; see  
176 **Supplementary materials** for further discussion of the genetic structure of the QTL)  
177 containing the  $\beta$ -tubulin isotype 1 locus. Within this gene, we identified a significant  
178 increase in the frequency of a Phe200Tyr variant (a phenylalanine [reference  
179 susceptible variant] to tyrosine [resistant variant] substitution at position 200) from  
180 pre- to post-treatment and relative to untreated controls (**Fig. 2B**;  $P = 1.7e-26$ ,  
181 genome-wide Cochran–Mantel–Haenszel (CMH) test between replicates). We also  
182 identified a small increase in frequency of the Phe167Tyr variant (mean  $freq_{pre-treatment}$   
183 = 0.14 to  $freq_{post-treatment} = 0.20$ ), however, no variation was found at the Glu198  
184 position. Considering the previous association between these variants and  
185 benzimidazole resistance, we conclude that the Phe200Tyr variant is the primary  
186 driver of phenotypic resistance in the X-QTL population.

187

188 *Haemonchus contortus* has multiple  $\beta$ -tubulin genes (37), and deletion of the  $\beta$ -  
189 tubulin isotype 2 gene (HCON\_00043670) on chromosome 2 has been associated  
190 with increased levels of resistance beyond that of mutations in the isotype 1 gene  
191 alone (14). Here, we found no evidence of deletions in isotype 2. However, a minor



192 but not significant increase in genetic differentiation between pre- and post-  
193 treatment populations was found at this locus, and a Glu198Val variant at a  
194 homologous site to a known resistance variant in isotype 1 was present at a low  
195 frequency in the genetic cross ( $freq_{\text{pre-treatment}} = 0.260$  to  $freq_{\text{post-treatment}} = 0.323$ ; not  
196 significant genome-wide CMH). However, on the US farms, the Glu198Val variant  
197 did vary in frequency between farms and was significantly correlated ( $r = 0.978$ ,  $P =$   
198  $1.02e-6$ ; Pearson's correlation) with  $EC_{50}$  values for benzimidazole resistance (**Fig.**  
199 **2C**). The variance observed in  $EC_{50}$  among resistant farm populations was not  
200 caused by variation in the frequency of the Phe200Tyr mutation of the isotype 1  
201 gene, as this variant was already at high frequency in all populations, except for the  
202 farm that was susceptible to benzimidazoles (Farm 1; **fig. S5**). These data suggest  
203 that once the isotype 1 Phe200Tyr variant has reached near fixation in the  
204 population, the Glu198Val variant of isotype 2 mediates higher levels of  
205 benzimidazole resistance than conferred by the Phe200Tyr variant alone. As such,  
206 this novel allele present in  $\beta$ -tubulin isotype 2 should be considered, in addition to  
207 the well-characterised isotype 1 variants, as a genetic marker for benzimidazole  
208 resistance.

209

210 In addition to the association with benzimidazole resistance, it has been suggested  
211 that the  $\beta$ -tubulin isotype 1 Phe200Tyr variant in *H. contortus* (38–40) and also at an  
212 equivalent variant site in a  $\beta$ -tubulin gene in the human-infective filarial nematode  
213 *Onchocerca volvulus* (41) is associated with ivermectin resistance. Here we found  
214 no evidence of selection on either the Phe167Tyr or Phe200Tyr variants (or any  
215 variant found in the region) in X-QTL analyses of ivermectin treatment (**fig. S6A**), nor  
216 any correlation with ivermectin  $EC_{50}$  on the US farms (**fig. S6B**). These data reaffirm  
217 that mutations in  $\beta$ -tubulin isotype 1 are specific to benzimidazole resistance.

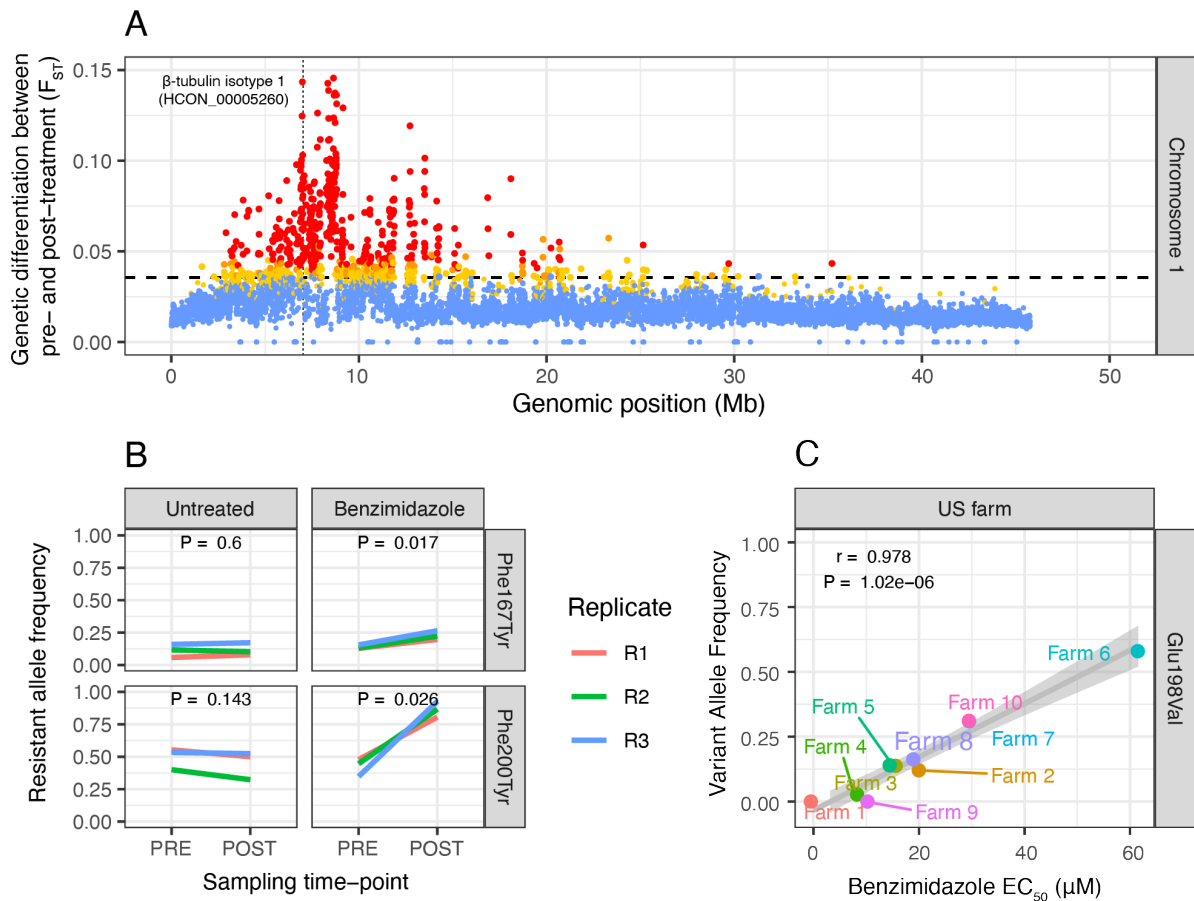

218

219

220 **Fig. 2. Characterisation of QTL associated with benzimidazole resistance.**

221 **(A)** Chromosome-wide genetic differentiation between pre- and post-benzimidazole  
 222 treatment on chromosome 1. Each point represents the mean  $F_{ST}$  in a five kb window;  
 223 points are coloured based on the concordance of individual replicates indicated by none  
 224 (blue), 1 of 3 (yellow), 2 of 3 (orange), or all 3 (red) above the genome-wide threshold. The  
 225 genome-wide threshold is defined as the mean + 3 SD of the chromosome-wide  $F_{ST}$   
 226 indicated by the horizontal dashed line, whereas the vertical dashed line highlights the  
 227 position of the  $\beta$ -tubulin isotype 1 (HCON\_00005260) gene. **(B)** Allele frequency change at  
 228 Phe167Tyr and Phe200Tyr variant positions of  $\beta$ -tubulin isotype 1 pre- and post-treatment,  
 229 including untreated time-matched control. Coloured lines show biological replicates.  $P$ -  
 230 values are calculated using pairwise t-tests of allele frequency by sampling time point (i.e.,  
 231 pre- and post-treatment). **(C)** Correlation between benzimidazole  $EC_{50}$  concentration ( $\mu M$ )  
 232 observed at particular farms and Glu198Val variant frequency of  $\beta$ -tubulin isotype 2  
 233 (HCON\_00043670) on US farms. Pearson's correlation ( $r$ ) and associated  $P$ -value together  
 234 with the trendline and standard error of the linear regression are shown.

235

236

237 ***Levamisole selection implicates acetylcholine receptors, including a novel acr-***  
238 ***8 variant, with resistance***

239 The anthelmintic activity of levamisole is due to its antagonistic effect on nematode  
240 nicotinic acetylcholine receptors (42), and resistance in *C. elegans* is typically  
241 associated with variation in subunits of these receptors or other accessory proteins  
242 that contribute to acetylcholine-mediated signalling (43). Here we identified two  
243 major QTLs on chromosomes 4 and 5 that contain a tandem duplication of the  
244 acetylcholine receptor subunit  $\beta$ -type *lev-1* (HCON\_00107690 & HCON\_00107700)  
245 and acetylcholine receptor subunit *acr-8* (HCON\_00151270), respectively (**Fig. 3A**).

246

247 The *H. contortus* *acr-8* gene (**Fig. 3B**) has long been implicated in levamisole  
248 resistance; a truncated isoform of *acr-8* containing the two first exons and a part of  
249 intron 2 (previously called *Hco-acr-8b*) (44), and subsequently, a 63 bp indel  
250 between exons 2 and 3 have been associated with resistance based on their  
251 presence in several resistant isolates (45). However, the functional consequence of  
252 these variants in mediating levamisole resistance *in vivo* is not yet clear. Here, we  
253 identified two larger deletion variants spanning 31,527,022 to 31,527,119 (97 bp) or  
254 31,527,121 (99 bp) on chromosome 5 that increased in frequency from 73.47% in  
255 the pre-treatment population to 86.58% after levamisole treatment (**Fig. 3C**; paired  
256 t-test across replicates,  $P = 0.1$ ). However, the *acr-8* indel was present in the  
257 levamisole susceptible parental MHco3(ISE) strain (59.05%) and was present at only  
258 a slightly higher frequency in the resistant MHco18(UGA) strain (63.55%). Thus,  
259 these data argue that the *acr-8* indel is a poor marker of levamisole resistance.

260

261 We did, however, identify a nonsynonymous variant (Ser168Thr) in *acr-8* that was  
262 strongly correlated with resistance across multiple datasets. In the X-QTL analyses,  
263 Ser168Thr increased to a high frequency after drug selection in the F2 generation  
264 (**Fig. 3D**; position 31,521,884; genome-wide CMH:  $P = 1.6e-15$ ; allele frequency  
265 change pre- vs post-treatment:  $P = 1.0e-4$ ; in time-matched no-treatment control:  $P$   
266 = 0.4). It was also found at a high frequency in the USA field population with the  
267 highest levamisole drug resistance phenotype (Farm 7;  $freq_{Ser168Thr} = 0.64$ ). This

268 association was supported in global diversity data of *H. contortus* (25), where we  
269 found the Ser168Thr variant fixed in parasites from the Kokstad (KOK; South Africa)  
270 population ( $freq_{Ser168Thr} = 1.0$ ;  $n = 4$ ), the only population with confirmed levamisole  
271 resistance in that study, whereas the variant was absent in all other populations  
272 analysed. The identification of Ser168Thr prompted us to look beyond *H. contortus*;  
273 a reanalysis of levamisole resistance in resequencing data from the closely related  
274 clade V parasitic nematode *Teladorsagia circumcincta* (46) revealed a homologous  
275 non-synonymous variant at high frequency in resistant parasites (Ser140Thr in  
276 Cont419:G75849C ;  $freq_{Ser140Thr} = 0.972$ ), which was absent in the susceptible  
277 population to which it was compared. Although a serine to threonine substitution is  
278 a relatively conservative change, we found the serine residue to be highly conserved  
279 among clade V nematodes (**fig. S7**), particularly among the parasite species,  
280 whereas in the free-living *Caenorhabditis spp.*, threonine is encoded at this position.  
281 In *C. elegans*, *acr-8* is genetically and functionally distinct relative to *acr-8* of  
282 parasitic nematodes and is not a component of the native levamisole receptor (47);  
283 the *C. elegans* functional homolog *lev-8*, which can be transgenically substituted by  
284 *H. contortus acr-8* to produce a functional receptor (48), does encode a serine at  
285 this homologous position. The *H. contortus* ACR-8 Ser168Thr variant lies  
286 immediately downstream of the cys-loop domain within the ligand-binding pocket  
287 and is immediately adjacent to a highly conserved tryptophan residue essential for  
288 ligand binding (49, 50) (**Fig. 3E**). Importantly, key residues downstream of the  
289 conserved tryptophan have previously been shown to influence levamisole  
290 sensitivity of closely related receptor subunits (51). Thus, we hypothesise that the  
291 Ser168Thr variant facilitates a change in the molecular interactions within the  
292 binding pocket of ACR-8, resulting in a decreased sensitivity to levamisole.

293

294 The identification of *lev-1* genes within the chromosome 4 QTL is compelling, with  
295 three intronic variants of *lev-1* (top variant position 14,995,062 in HCON\_00107700;  
296  $P = 1.7e-20$ ; CMH test) among of the top ten most differentiated SNPs on this  
297 chromosome. However, it remains unclear what effect the overall observed variation  
298 in the *lev-1* genes has on levamisole resistance. Although multiple non-synonymous  
299 variants were also identified (seven and three variants for HCON\_00107690 and

300 HCON\_00107700, respectively), none were predicted to cause high-effect changes  
301 in the protein sequence and exhibited only relatively minor shifts in allele frequency  
302 upon levamisole treatment. In *C. elegans*, several dominant resistant variants of *lev-*  
303 *1* have been described (not found in the data described here); however, *lev-1* can  
304 be lost without affecting the function of the receptor (43). Examination of variation in  
305 *lev-1* expression in addition to genetic variation may be required to elucidate the  
306 role of *H. contortus lev-1* subunits in levamisole resistance. Close to the *lev-1* genes  
307 and toward the centre of the QTL, four of the top ten variants in chromosome 4  
308 were found in HCON\_00107560 (top non-synonymous variant: Arg934His at  
309 position 14,781,344;  $P = 1.0e-21$ ; CMH test), an ortholog of *C. elegans kdin-1*.  
310 Highly conserved with mammalian orthologs (52), *kdin-1* has been shown to co-  
311 localise with acetylcholine receptors at rat neuromuscular junctions during  
312 development (53) where, via a PDZ domain, it participates in the coordination of  
313 signalling components including ion channels and neurotransmitters. The precise  
314 role of HCON\_00107560 or *kdin-1* in *H. contortus* or *C. elegans*, respectively,  
315 remains unknown; however, its putative association with levamisole response here  
316 warrants further investigation.

317

318 Signals of selection on two components of the pentameric acetylcholine receptor  
319 prompted us to look for selection on the remaining subunits. Although the  
320 expression of *unc-63* (HCON\_00024380) and *unc-29.3* (HCON\_00003520) mRNAs  
321 were significantly reduced in the larvae of resistant MHco18(UGA) strain (54), we  
322 found no evidence of selection on the region of the genome containing these genes.

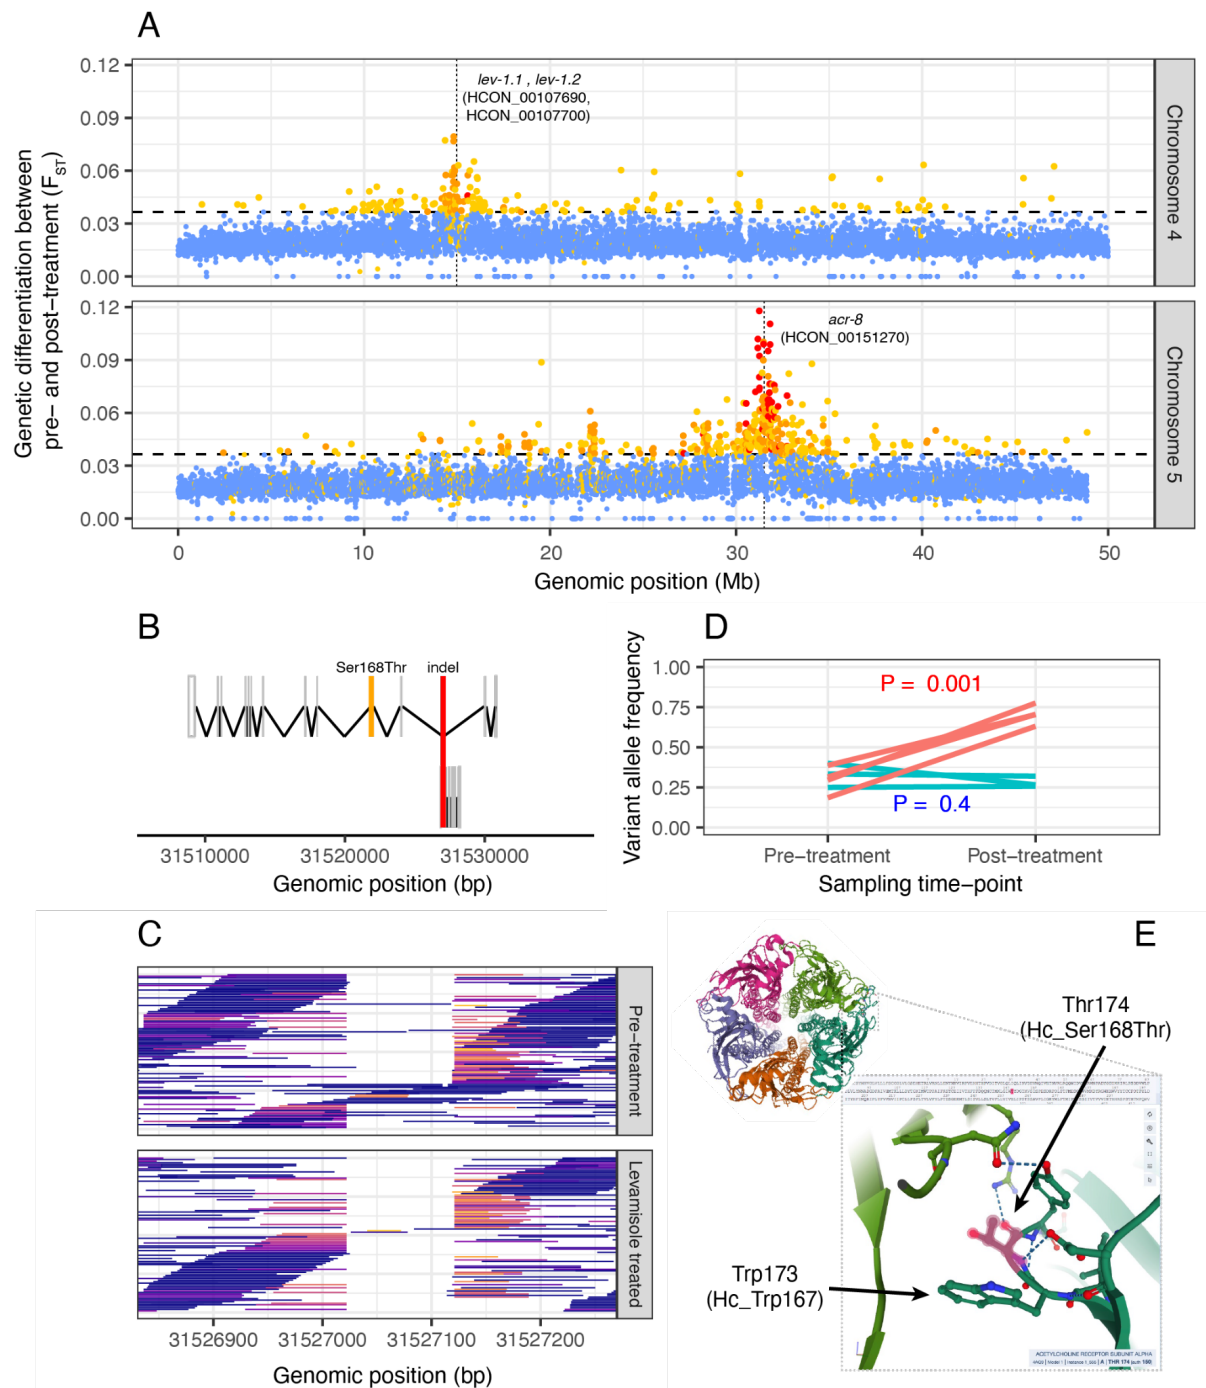

323

324

325

**Fig. 3. Characterisation of QTL associated with levamisole resistance.**

326

(A) QTL between pre-treatment and levamisole-treated parasites on chromosome 4 (top)

327

and chromosome 5 (bottom). Each point represents the mean  $F_{ST}$  in a five kb window;

328

points are coloured based on the concordance of individual replicates indicated by none (blue), 1 of 3 (yellow), 2 of 3 (orange), or all 3 (red) above the genome-wide threshold

329

(horizontal dashed line; mean + 3 SD of the chromosome-wide  $F_{ST}$ ).

330

(B) Gene model for *acr-8* (top; HCON\_00151270) and a cuticle collagen (bottom; HCON\_00151260), highlighting

331

332 the position of the overlapping *acr-8*/levamisole-associated indel and the Ser168Thr variant  
333 of *acr-8*. **(C)** Visualisation of sequencing reads supporting the *acr-8* intronic indel. Mapped  
334 reads are coloured to reflect the degree to which they have been clipped to allow correct  
335 mapping in the presence of the deletion, i.e. reads that have not been clipped are blue,  
336 whereas reads that are moderate to highly clipped are coloured red to yellow, respectively.  
337 **(D)** Comparison of Ser168Thr variant frequency between pre- and post-levamisole  
338 treatment (red) and time-matched untreated controls (green). **(E)** Structure of the  
339 pentameric cys-loop acetylcholine receptor of *Torpedo marmorata* (Protein Data Base ID:  
340 4AQ9), one of the few species from which the receptor's structure has been resolved (55).  
341 The Trp[Ser/Thr]Tyr motif is highly conserved among the clade V nematodes (**fig. S7**) and  
342 the distantly related alpha subunit of *T. marmorata*; Thr174, the homologous position of the  
343 *H. contortus* Hc\_Ser168Thr variant of *acr-8*, lies within the acetylcholine binding pocket at  
344 the interface of the alpha and gamma subunits and adjacent to Trp173 (*H. contortus*  
345 Hc\_Trp167), a residue essential for ligand binding.

346

347

348

#### 349 ***A resolved ivermectin QTL implicates cky-1 as a novel mediator of resistance***

350 Ivermectin is a critically important broad-spectrum drug used to control several  
351 human- and veterinary-infective helminths worldwide and is also widely used as an  
352 acaricide targeting ticks and mites. We recently identified a ~5 Mb QTL associated  
353 with ivermectin resistance from 37 to 42 Mb on chromosome 5 from the analysis of  
354 a backcross experiment (34, 56), and subsequently, we identified evidence of  
355 selection in the same chromosomal region in ivermectin-resistant field populations  
356 from Africa and Australia (25). Although the introgression region from the backcross  
357 was broad (57), the genetic architecture of the QTL was consistent with a single  
358 dominant variant driving resistance, and we were able to demonstrate that most  
359 candidate genes previously proposed to be associated with resistance were not  
360 under direct ivermectin selection. However, we were unable to confidently identify  
361 any novel candidate driving mutation among the ~360 genes lying within the region  
362 (34).

363

364 Here, we confirm the QTL within the previously implicated chromosome 5 region at  
365 ~37.5 Mb (34, 56) but with significantly increased resolution (**Fig. 4A**). We have  
366 narrowed the genetic association to approximately 300 kb wide (region:  
367 ~37,250,000-37,550,000), based on the region of highest differentiation between  
368 independently replicated pre- and post-treatment X-QTL samples (**Fig. 4B**). This  
369 region was also highly differentiated between pre-treatment larvae and adult male  
370 worms that survived ivermectin treatment *in vivo* (**fig. S8 A,B**), and between larvae  
371 that survived treatment with an EC<sub>75</sub> dose of ivermectin and those sensitive to an  
372 EC<sub>50</sub> dose *in vitro* (**fig. S8 C,D**). Together, these results confirm that this locus is  
373 under direct selection and mediates resistance in both the parasitic stages *in vivo*  
374 and in the free-living stages *in vitro* (see **Supplementary materials** for further  
375 discussion). Finally, this was the only region in the genome where increased levels  
376 of ivermectin resistance (i.e., EC<sub>50</sub>) was associated with a loss of genetic diversity in  
377 moderately or highly resistant field populations relative to susceptible populations  
378 (**Fig 4C**), consistent with a selective sweep in response to ivermectin-mediated  
379 selection.

380

381 The main chromosome 5 QTL contained 25 genes and included an expansion of  
382 protein kinases (8/21 genes present in the genome with the InterPro identifier  
383 IPR015897), some of which had the highest statistical association with resistance;  
384 for example, HCON\_00155240 (intronic position 37,336,132,  $P = 3.3e-13$ ; position  
385 37,235,944,  $P = 1.2e-12$ ) and HCON\_00155270 (intronic position 37,343,439,  $P =$   
386  $1.0e-10$ ). These protein kinases are, however, novel leads with no previous  
387 association to drug resistance, and a lack of functional orthologs and observed  
388 gene expansion made it difficult to further infer and test a role for these genes in  
389 ivermectin resistance.

390

391 Towards the middle of the QTL, we identified *cky-1* (HCON\_00155390; positions  
392 37,487,982 - 37,497,398) as a new mediator of resistance, based on several lines of  
393 evidence. In the X-QTL data, *cky-1* contained eight moderately to highly  
394 differentiated significant non-synonymous variants (top variant: position 37,497,061  
395 [Ser583Pro],  $P = 9.6e-09$ ; CMH test). In a complementary study, we showed *cky-1*



396 was the only gene in the region significantly upregulated in both males and females  
397 of the resistant MHco18(UGA) isolate relative to MHco3(ISE) and was one of the  
398 most upregulated genes genome-wide (RNA-Seq paper). In this study, RT-qPCR of  
399 *cky-1* from the parental isolates of the cross and two unrelated ivermectin-resistant  
400 *H. contortus* strains revealed significant overexpression in ivermectin-resistant  
401 relative to sensitive strains (**Fig. 4E**), an observation that was replicated between  
402 sensitive and ivermectin-resistant strains of the related parasite, *T. circumcincta*  
403 (**Fig. 4E**). To explore *cky-1* further, we assayed *C. elegans* developmental and  
404 pumping behavioural phenotypes, both known to be perturbed by ivermectin  
405 exposure (58), to test the role of differential expression of *cky-1* on the resistant  
406 phenotype in the presence of ivermectin. While complete knockout of *cky-1* was  
407 non-viable, both a balanced deletion (VC2274) (**Fig. 4E**) and RNAi knockdown (**Fig.**  
408 **4F**) of *cky-1* increased the sensitivity of *C. elegans* to ivermectin relative to the  
409 ivermectin-susceptible N2 strain. Finally, in two independent transgenic *C. elegans*  
410 strains, we found that overexpression of *cky-1* partially improved fitness in the  
411 presence of ivermectin relative to the N2 control (**Fig. 4G**). The level of *cky-1*  
412 expression is, therefore, associated with and contributes to the ivermectin  
413 resistance phenotype in nematodes.

414

415 Two additional, less prominent QTLs on chromosome 5 at ~46 Mb and on  
416 chromosome 2 at ~3 Mb were also identified after ivermectin treatment (**Fig. 4A**;  
417 see **Supplementary materials** for a description of the two QTLs). The second  
418 chromosome 5 QTL was identified as a candidate region associated with resistance  
419 in the backcross (34); however, we did not have the statistical power to differentiate  
420 it from the main QTL in that experiment. Here, the QTL appeared to segregate  
421 independently of the prominent 37.5 Mb peak, providing more robust evidence of a  
422 second resistance-conferring variant on chromosome 5. Although the main  
423 chromosome 5 QTL at 37.5 Mb was present in all selection experiments with  
424 ivermectin, the secondary QTLs were variable between replicates and experiments.  
425 To further refine the association, we exposed the F5 generation of the cross to a  
426 half standard dose of ivermectin, followed by a double dose thereafter. The  
427 rationale was first to identify low-effect variants (responding to the half dose

428 treatment), then select a subset of variants that conferred resistance at high doses  
429 (see **Supplementary materials** for additional background). In these experiments,  
430 we consistently detected the main chromosome 5 QTL but not the less prominent  
431 chromosome 2 QTL. Additionally, we detected the presence of at least three new  
432 minor QTLs (**fig. S10**, supplementary text). Of practical significance, the  
433 identification of novel replicate-specific variants in addition to the main  
434 chromosome 5 QTL highlights the consequence of under-dosing in selecting novel  
435 variants, and emphasises the importance of correct dosing in the field.

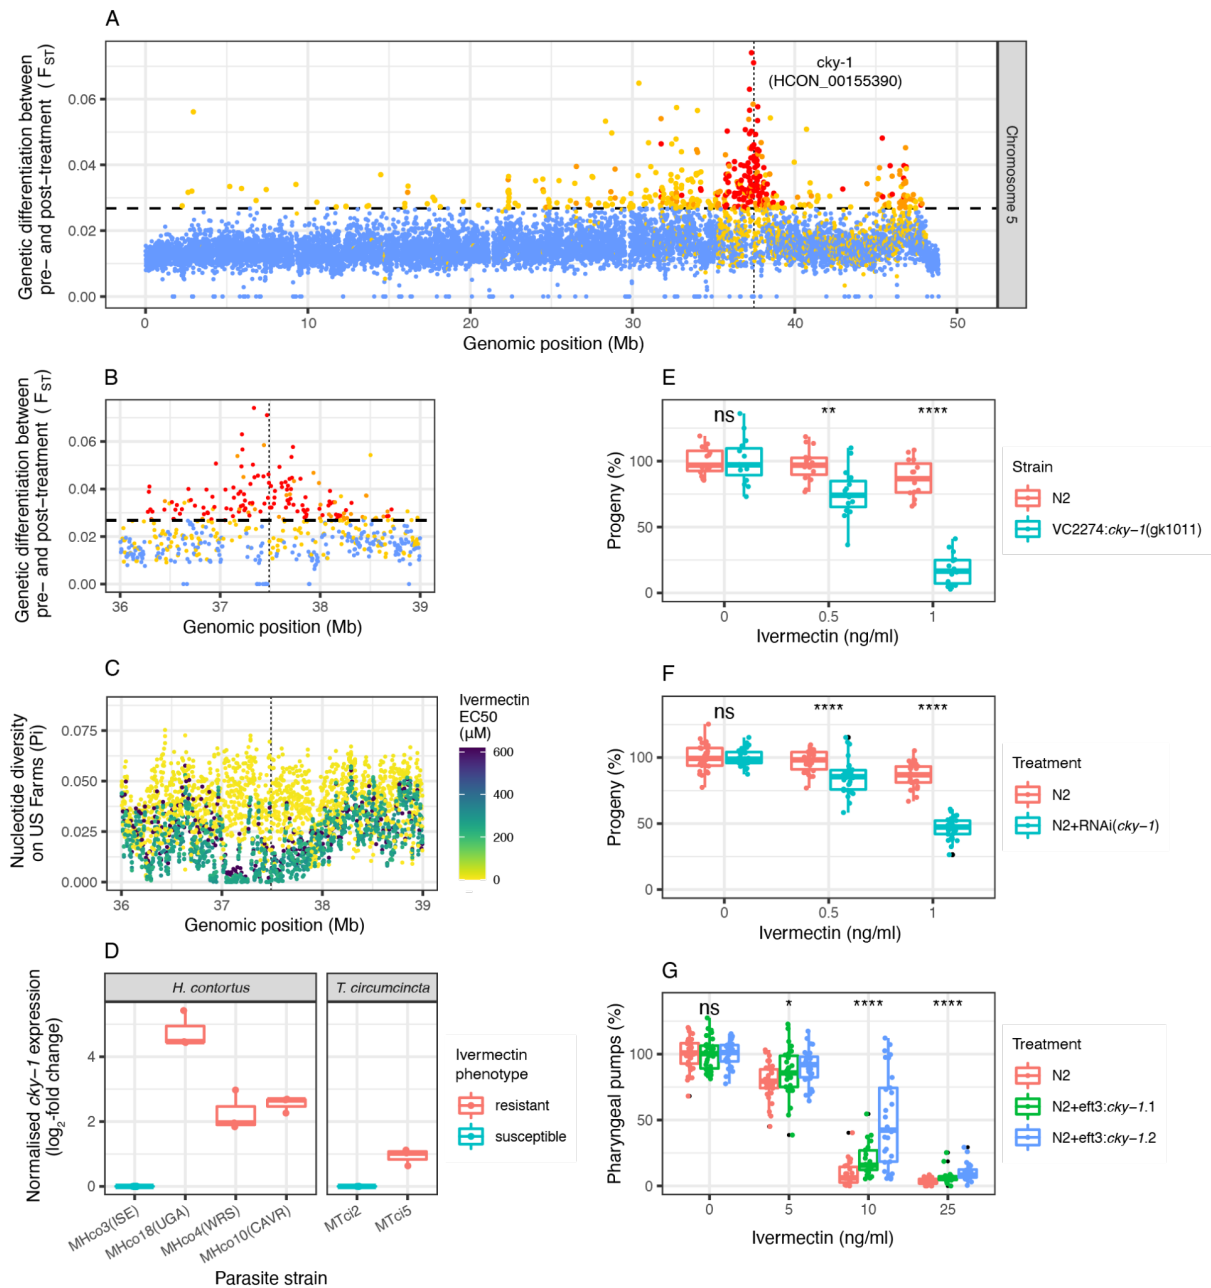

436

437

438 **Fig. 4. Characterisation of QTL associated with ivermectin resistance.**

439 **(A)** QTL between pre- and post-ivermectin treatment on chromosome 5. Each point  
 440 represents the mean  $F_{ST}$  in a five kb window; points are coloured based on the concordance  
 441 of individual replicates indicated by none (blue), 1 of 3 (yellow), 2 of 3 (orange), or all 3 (red)  
 442 above the genome-wide threshold (horizontal dashed line; mean + 3 SD of the  
 443 chromosome-wide  $F_{ST}$ ). A magnified aspect of the main chromosome 5 QTL, highlighting  
 444 **(B)** genetic differentiation ( $F_{ST}$ ) in the X-QTL cross, and **(C)** nucleotide diversity ( $P_i$ ) on US  
 445 farms, where each farm is coloured by the degree of ivermectin resistance ( $EC_{50}$ ) measured  
 446 by larval development assays. In A, B and C, the position of *cky-1* is indicated by the

447 vertical dashed line. **(D)** RT-qPCR analysis of *cky-1* expression in both *H. contortus* and *T.*  
448 *circumcincta* strains that differ in their ivermectin resistance phenotype. Data represents  
449  $\log_2$ -transformed expression normalised to actin or GAPDH control genes for *H. contortus*  
450 and *T. circumcincta*, respectively. Downregulation of *cky-1* expression in *C. elegans* by  
451 either **(E)** a balanced deletion or **(F)** RNAi-knockdown increases ivermectin sensitivity  
452 relative to the control N2 strain, based on developmental assays measuring the percentage  
453 of progeny surviving to adulthood relative to DMSO controls. **(G)** Overexpression of *cky-1*  
454 increases resistance to ivermectin relative to the control *C. elegans* N2 strain based on a  
455 pharyngeal pumping assay. In **E**, **F**, and **G**, each point represents an independent treatment  
456 condition, which is normalised to a DMSO control without ivermectin. A Kruskal-Wallis test  
457 was used to determine whether treatment condition differed from untreated control, where  
458 ns = not significant, \*  $p < 0.05$ , \*\*  $p < 0.01$ , and \*\*\*\*  $p < 0.0001$ .

## 459 Discussion

460 Anthelmintics are currently the most important tool for controlling parasitic worm  
461 infections in humans and animals worldwide, and this is likely to remain true for the  
462 foreseeable future. However, this paradigm of control is threatened by the  
463 emergence and spread of anthelmintic-resistant parasites. Despite the large health  
464 and economic impacts resulting from increasing levels of anthelmintic resistance,  
465 multiple complicating factors have hindered the ability to determine the genetic loci  
466 responsible for resistance. Here we demonstrate an efficient approach to map  
467 multiple drug resistance-conferring loci for three of the most important anthelmintic  
468 drugs in the globally distributed and genetically tractable parasitic nematode, *H.*  
469 *contortus*. We have identified novel variants and loci likely involved in resistance to  
470 each of these drug classes; these include the  $\beta$ -tubulin isotype 2 Glu198Val variant  
471 correlated with benzimidazole resistance in field populations, the *acr-8* Ser168Thr  
472 variant associated with levamisole resistance in both the cross and field populations  
473 of *H. contortus*, and *cky-1* as a novel candidate gene that mediates ivermectin  
474 response. Our approach was validated by identifying QTLs and variants previously  
475 associated with drug resistance, for example, the  $\beta$ -tubulin isotype 1 Phe200Tyr  
476 variant associated with benzimidazole resistance and the *acr-8* indel variant  
477 associated with levamisole resistance. However, for the latter, we provide evidence  
478 against the indel being a reliable marker of resistance. Finally, we note an absence  
479 of many previously proposed ivermectin-associated candidate genes in the QTL  
480 described, highlighting both the limitation of candidate gene approaches and the  
481 power of genome-wide forward-genetic strategies to robustly identify regions of the  
482 genome containing known and novel mediators of resistance (9).

483

484 We have refined a previously identified QTL for ivermectin resistance on  
485 chromosome 5 (34) to ~300 kb, and together with functional genetic evidence from  
486 expression and knockout experiments, we have explicitly tested the role of our  
487 proposed candidate in the main ivermectin QTL on chromosome 5, the NPAS4  
488 ortholog *cky-1*. This gene encodes an activity-dependent basic Helix-Loop-Helix  
489 (bHLH)-PAS family transcription factor shown in mammals to regulate the  
490 excitation/inhibition balance upon neuronal activation to limit excitotoxicity (59) and

491 during the development of inhibitory synapses to control the expression of activity-  
492 dependent genes (60). It is yet to be determined if this is a conserved molecular  
493 function in nematodes; however, it is tempting to speculate that the  
494 hyperexcitability as a result of induced activation of ion channels by ivermectin at  
495 the neuromuscular junction is, at least in part, controlled by a “retuning” of the  
496 excitation/inhibition balance to limit toxicity. The role of *cky-1* in ivermectin  
497 resistance is supported by: (i) genetic differentiation between susceptible and  
498 resistant strains around this locus relative to genome-wide variation that is  
499 replicated in geographically and genetically diverse strains here and elsewhere (25,  
500 34, 61), (ii) the presence of non-synonymous variants that are highly differentiated  
501 before and after treatment, (iii) increased gene expression of *cky-1* in resistant  
502 strains relative to susceptible strains (supported by genome-wide RNA-seq (RNA-  
503 seq paper)), (iv) knockdown of the *C. elegans* ortholog leading to hypersensitivity to  
504 ivermectin, and (v) partial induction of resistance in *C. elegans* by overexpression of  
505 *cky-1*. We acknowledge that overexpression of *cky-1* in *C. elegans* does not  
506 recapitulate the high levels of ivermectin resistance seen in *H. contortus* or, for  
507 example, by concurrent mutation of glutamate-gated chloride channels in *C.*  
508 *elegans* (21); while this may argue against *cky-1* as a universal mediator of  
509 resistance, it likely reflects the challenge of using a heterologous expression system  
510 in which there is an assumption that the biology (and, therefore, response to  
511 treatment) is concordant between the free-living and parasitic species, and/or may  
512 reflect the multigenic nature of ivermectin resistance in different species (62–64).  
513 Given the lack of an obvious causal non-synonymous variant, we hypothesise that a  
514 non-coding variant that influences the expression of *cky-1* is under selection in  
515 resistant strains of *H. contortus*; however, such variants are difficult to validate  
516 without genotype and transcriptional phenotype data from a large number of  
517 individual worms.

518

519 It is broadly accepted that the mode of action of ivermectin is on ligand-gated ion  
520 channels, and ivermectin resistance has been associated with variants in glutamate-  
521 gated channels (65). Concurrent mutation of a number of these channels (*glc-1*, *avr-*  
522 *14* and *avr-15*) confers high-level resistance in *C. elegans* (21) and selection on at

523 least one of these channels (*glc-1*) in wild strains (66) has been demonstrated. We  
524 find no evidence to suggest that genetic variation in these channels confers  
525 ivermectin resistance in *H. contortus*. Transcriptional changes in these channels in  
526 resistant, relative to drug-susceptible, parasite strains have been demonstrated  
527 previously; for example, the glutamate-gated chloride channel subunits (*glc-3*, *glc-*  
528 *5*), as well as p-glycoprotein ABC transporters (*pgp-1*, *pgp-2*, *pgp-9*) (54) in the  
529 MHco18(UGA) strain. Similarly, a *pgp-9* copy number variant was associated with  
530 ivermectin resistance in a genetic cross and bulk segregant experiment in the  
531 related nematode *T. circumcincta* (46), while transgenic overexpression of the  
532 equine parasitic nematode *Parascaris univalens* *pgp-9* modulated ivermectin  
533 sensitivity in *C. elegans* (67). However, none of these genes were identified in  
534 regions of differentiation after treatment in this study, suggesting these genes are  
535 not the direct target of selection. However, we cannot exclude that variation in  
536 expression of these genes may be a downstream response to selection on a  
537 transcriptional regulator such as *cky-1*.

538 The use of genetic crosses, in which the genetics of the parasites can be controlled,  
539 is the ideal way to generate populations of individuals in which the relationship  
540 between genotype and phenotype can be assayed. Our approach here relies on  
541 selecting populations of parasites using drug treatment, however, advances are still  
542 required to improve phenotyping of resistance in individual parasites. The ability to  
543 do so would improve our understanding of the molecular basis of drug resistance  
544 phenotypes and enable more sophisticated genetic approaches to unravel the role  
545 of the minor signatures of selection we observe in this experiment. Recent  
546 advances in single larvae whole-genome sequencing (68) and low-input RNA  
547 sequencing (69), even at single-cell resolution (70), now provide the tools to allow a  
548 more precise understanding of molecular and cellular phenotypes for drug response  
549 and may help to fully understand the role of *cky-1*. The identification of *cky-1* as a  
550 putative candidate offers new plausible hypotheses relevant to a resistant  
551 phenotype, whereby *cky-1* may act: (i) during development to establish a neuronal  
552 architecture that is more tolerant to hyperexcitability such as that caused by  
553 ivermectin, and/or (ii) in response to ivermectin exposure by initiating transcription  
554 of downstream genes to modulate the excessive excitation/inhibition imbalance,

555 thereby mitigating the lethal effect. These hypotheses will require further validation,  
556 aided in the first instance by identifying the downstream targets of *cky-1*. However,  
557 it is clear that the molecular mechanisms by which parasites develop ivermectin  
558 resistance are more complex than previously appreciated. Broader, systems biology  
559 approaches are likely needed to understand the relationship between direct  
560 evidence of selection in the genome and the downstream transcriptional responses  
561 that enable parasite survival when challenged with ivermectin. By defining the  
562 genomic landscape of anthelmintic resistance even in a single resistant strain, our  
563 results refocus effort away from candidate genes with limited support and redefine  
564 our understanding of the evolution of anthelmintic resistance in helminths of  
565 veterinary and medical importance.



566 **References and Notes:**

- 567 1. R. M. Kaplan, Drug resistance in nematodes of veterinary importance: a status report.  
568 *Trends Parasitol.* **20**, 477–481 (2004).
- 569 2. R. M. Kaplan, A. N. Vidyashankar, An inconvenient truth: global worming and  
570 anthelmintic resistance. *Vet. Parasitol.* **186**, 70–78 (2012).
- 571 3. J. Charlier, L. Rinaldi, V. Musella, H. W. Ploeger, C. Chartier, H. R. Vineer, B. Hinney, G.  
572 von Samson-Himmelstjerna, B. Băcescu, M. Mickiewicz, T. L. Mateus, M. Martinez-  
573 Valladares, S. Quealy, H. Azaizeh, B. Sekovska, H. Akkari, S. Petkevicius, L. Hektoen,  
574 J. Höglund, E. R. Morgan, D. J. Bartley, E. Claerebout, Initial assessment of the  
575 economic burden of major parasitic helminth infections to the ruminant livestock  
576 industry in Europe. *Prev. Vet. Med.* **182**, 105103 (2020).
- 577 4. P. D. Jimenez Castro, S. B. Howell, J. J. Schaefer, R. W. Avramenko, J. S. Gilleard, R.  
578 M. Kaplan, Multiple drug resistance in the canine hookworm *Ancylostoma caninum*: an  
579 emerging threat? *Parasit. Vectors.* **12**, 576 (2019).
- 580 5. C. Bourguinat, A. C. Y. Lee, R. Lizundia, B. L. Blagburn, J. L. Liotta, M. S. Kraus, K.  
581 Keller, C. Epe, L. Letourneau, C. L. Kleinman, T. Paterson, E. C. Gomez, J. A. Montoya-  
582 Alonso, H. Smith, A. Bhan, A. S. Peregrine, J. Carmichael, J. Drake, R. Schenker, R.  
583 Kaminsky, D. D. Bowman, T. G. Geary, R. K. Prichard, Macrocyclic lactone resistance  
584 in *Dirofilaria immitis*: Failure of heartworm preventives and investigation of genetic  
585 markers for resistance. *Vet. Parasitol.* **210**, 167–178 (2015).
- 586 6. P. D. Jimenez Castro, A. Venkatesan, E. Redman, R. Chen, A. Malatesta, H. Huff, D. A.  
587 Zuluaga Salazar, R. Avramenko, J. S. Gilleard, R. M. Kaplan, Multiple drug resistance in  
588 hookworms infecting greyhound dogs in the USA. *Int. J. Parasitol. Drugs Drug Resist.*  
589 **17**, 107–117 (2021).
- 590 7. World Health Organization, “Ending the neglect to attain the Sustainable Development  
591 Goals: A road map for neglected tropical diseases 2021–2030” (World Health  
592 Organization, Geneva, 2020), (available at  
593 [https://www.who.int/neglected\\_diseases/resources/who-ucn-ntd-2020.01/en/](https://www.who.int/neglected_diseases/resources/who-ucn-ntd-2020.01/en/)).
- 594 8. A. Montresor, D. Mupfasoni, A. Mikhailov, P. Mwinzi, A. Lucianez, M. Jamsheed, E.  
595 Gasimov, S. Warusavithana, A. Yajima, Z. Bisoffi, D. Buonfrate, P. Steinmann, J.  
596 Utzinger, B. Levecke, J. Vlaminc, P. Cools, J. Vercruysse, G. Cringoli, L. Rinaldi, B.  
597 Blouin, T. W. Gyorkos, The global progress of soil-transmitted helminthiasis control in  
598 2020 and World Health Organization targets for 2030. *PLoS Negl. Trop. Dis.* **14**,  
599 e0008505 (2020).
- 600 9. S. R. Doyle, J. A. Cotton, Genome-wide approaches to investigate anthelmintic  
601 resistance. *Trends Parasitol.* **35**, 289–301 (2019).
- 602 10. A. C. Kotze, P. W. Hunt, P. Skuce, G. von Samson-Himmelstjerna, R. J. Martin, H.  
603 Sager, J. Krücken, J. Hodgkinson, A. Lespine, A. R. Jex, J. S. Gilleard, R. N. Beech, A.

- 604 J. Wolstenholme, J. Demeler, A. P. Robertson, C. L. Charvet, C. Neveu, R. Kaminsky,  
605 L. Rufener, M. Alberich, C. Menez, R. K. Prichard, Recent advances in candidate-gene  
606 and whole-genome approaches to the discovery of anthelmintic resistance markers  
607 and the description of drug/receptor interactions. *Int. J. Parasitol. Drugs Drug Resist.* **4**,  
608 164–184 (2014).
- 609 11. S. R. Hahnel, C. M. Dilks, I. Heisler, E. C. Andersen, D. Kulke, *Caenorhabditis elegans*  
610 in anthelmintic research - Old model, new perspectives. *Int. J. Parasitol. Drugs Drug*  
611 *Resist.* **14**, 237–248 (2020).
- 612 12. M. Driscoll, E. Dean, E. Reilly, E. Bergholz, M. Chalfie, Genetic and molecular analysis  
613 of a *Caenorhabditis elegans* beta-tubulin that conveys benzimidazole sensitivity. *J. Cell*  
614 *Biol.* **109**, 2993–3003 (1989).
- 615 13. M. H. Roos, J. H. Boersema, F. H. Borgsteede, J. Cornelissen, M. Taylor, E. J.  
616 Ruitenbergh, Molecular analysis of selection for benzimidazole resistance in the sheep  
617 parasite *Haemonchus contortus*. *Mol. Biochem. Parasitol.* **43**, 77–88 (1990).
- 618 14. M. S. Kwa, F. N. Kooyman, J. H. Boersema, M. H. Roos, Effect of selection for  
619 benzimidazole resistance in *Haemonchus contortus* on beta-tubulin isotype 1 and  
620 isotype 2 genes. *Biochem. Biophys. Res. Commun.* **191**, 413–419 (1993).
- 621 15. A. Silvestre, J. Cabaret, Mutation in position 167 of isotype 1 beta-tubulin gene of  
622 Trichostrongylid nematodes: role in benzimidazole resistance? *Mol. Biochem. Parasitol.*  
623 **120**, 297–300 (2002).
- 624 16. M. Ghisi, R. Kaminsky, P. Mäser, Phenotyping and genotyping of *Haemonchus*  
625 *contortus* isolates reveals a new putative candidate mutation for benzimidazole  
626 resistance in nematodes. *Vet. Parasitol.* **144**, 313–320 (2007).
- 627 17. C. M. Dilks, S. R. Hahnel, Q. Sheng, L. Long, P. T. McGrath, E. C. Andersen,  
628 Quantitative benzimidazole resistance and fitness effects of parasitic nematode beta-  
629 tubulin alleles. *Int. J. Parasitol. Drugs Drug Resist.* **14**, 28–36 (2020).
- 630 18. M. S. G. Kwa, J. G. Veenstra, M. Van Dijk, M. H. Roos,  $\beta$ -Tubulin genes from the  
631 parasitic nematode *Haemonchus contortus* modulate drug resistance in *Caenorhabditis*  
632 *elegans*. *Journal of Molecular Biology.* **246**, 500–510 (1995).
- 633 19. S. R. Hahnel, S. Zdraljevic, B. C. Rodriguez, Y. Zhao, P. T. McGrath, E. C. Andersen,  
634 Extreme allelic heterogeneity at a *Caenorhabditis elegans* beta-tubulin locus explains  
635 natural resistance to benzimidazoles. *PLoS Pathog.* **14**, e1007226 (2018).
- 636 20. M. Zamanian, D. E. Cook, S. Zdraljevic, S. C. Brady, D. Lee, J. Lee, E. C. Andersen,  
637 Discovery of genomic intervals that underlie nematode responses to benzimidazoles.  
638 *PLoS Negl. Trop. Dis.* **12**, e0006368 (2018).
- 639 21. J. A. Dent, M. M. Smith, D. K. Vassilatis, L. Avery, The genetics of ivermectin resistance  
640 in *Caenorhabditis elegans*. *Proc. Natl. Acad. Sci. U. S. A.* **97**, 2674–2679 (2000).

- 641 22. J. S. Gilleard, *Haemonchus contortus* as a paradigm and model to study anthelmintic  
642 drug resistance. *Parasitology*. **140**, 1506–1522 (2013).
- 643 23. S. R. Doyle, C. Bourguinat, H. C. Nana-Djeunga, J. A. Kengne-Ouafo, S. D. S. Pion, J.  
644 Bopda, J. Kamgno, S. Wanji, H. Che, A. C. Kuesel, M. Walker, M.-G. Basáñez, D. A.  
645 Boakye, M. Y. Osei-Atweneboana, M. Boussinesq, R. K. Prichard, W. N. Grant,  
646 Genome-wide analysis of ivermectin response by *Onchocerca volvulus* reveals that  
647 genetic drift and soft selective sweeps contribute to loss of drug sensitivity. *PLoS Negl.*  
648 *Trop. Dis.* **11**, e0005816 (2017).
- 649 24. J. S. Gilleard, Understanding anthelmintic resistance: the need for genomics and  
650 genetics. *Int. J. Parasitol.* **36**, 1227–1239 (2006).
- 651 25. G. Sallé, S. R. Doyle, J. Cortet, J. Cabaret, M. Berriman, N. Holroyd, J. A. Cotton, The  
652 global diversity of *Haemonchus contortus* is shaped by human intervention and  
653 climate. *Nat. Commun.* **10**, 4811 (2019).
- 654 26. D. J. Berger, T. Crellen, P. H. L. Lamberton, F. Allan, A. Tracey, J. D. Noonan, N. B.  
655 Kabatereine, E. M. Tukahebwa, M. Adriko, N. Holroyd, J. P. Webster, M. Berriman, J.  
656 A. Cotton, Whole-genome sequencing of *Schistosoma mansoni* reveals extensive  
657 diversity with limited selection despite mass drug administration. *Nature*  
658 *Communications*. **12** (2021), doi:10.1038/s41467-021-24958-0.
- 659 27. R. Kaminsky, P. Ducray, M. Jung, R. Clover, L. Rufener, J. Bouvier, S. S. Weber, A.  
660 Wenger, S. Wieland-Berghausen, T. Goebel, N. Gauvry, F. Pautrat, T. Skripsky, O.  
661 Froelich, C. Komoin-Oka, B. Westlund, A. Sluder, P. Mäser, A new class of  
662 anthelmintics effective against drug-resistant nematodes. *Nature*. **452**, 176–180 (2008).
- 663 28. S. Preston, A. Jabbar, C. Nowell, A. Joachim, B. Ruttkowski, J. Baell, T. Cardno, P. K.  
664 Korhonen, D. Piedrafita, B. R. E. Ansell, A. R. Jex, A. Hofmann, R. B. Gasser, Low cost  
665 whole-organism screening of compounds for anthelmintic activity. *Int. J. Parasitol.* **45**,  
666 333–343 (2015).
- 667 29. C. C. Bassetto, A. F. T. Amarante, Vaccination of sheep and cattle against  
668 haemonchosis. *J. Helminthol.* **89**, 517–525 (2015).
- 669 30. D. P. Knox, D. L. Redmond, G. F. Newlands, P. J. Skuce, D. Pettit, W. D. Smith, The  
670 nature and prospects for gut membrane proteins as vaccine candidates for  
671 *Haemonchus contortus* and other ruminant trichostrongyloids. *Int. J. Parasitol.* **33**,  
672 1129–1137 (2003).
- 673 31. A. Burga, E. Ben-David, T. L. Vergara, J. Boocock, L. Kruglyak, Fast genetic mapping  
674 of complex traits in *C. elegans* using millions of individuals in bulk. *Nature*  
675 *Communications*. **10**, 2680 (2019).
- 676 32. F. D. Chevalier, C. L. L. Valentim, P. T. LoVerde, T. J. C. Anderson, Efficient linkage  
677 mapping using exome capture and extreme QTL in schistosome parasites. *BMC*  
678 *Genomics*. **15**, 617 (2014).

- 679 33. S. R. Doyle, A. Tracey, R. Laing, N. Holroyd, D. Bartley, W. Bazant, H. Beasley, R.  
680 Beech, C. Britton, K. Brooks, U. Chaudhry, K. Maitland, A. Martinelli, J. D. Noonan, M.  
681 Paulini, M. A. Quail, E. Redman, F. H. Rodgers, G. Sallé, M. Z. Shabbir, G.  
682 Sankaranarayanan, J. Wit, K. L. Howe, N. Sargison, E. Devaney, M. Berriman, J. S.  
683 Gilleard, J. A. Cotton, Genomic and transcriptomic variation defines the chromosome-  
684 scale assembly of *Haemonchus contortus*, a model gastrointestinal worm. *Commun*  
685 *Biol.* **3**, 656 (2020).
- 686 34. S. R. Doyle, C. J. R. Illingworth, R. Laing, D. J. Bartley, E. Redman, A. Martinelli, N.  
687 Holroyd, A. A. Morrison, A. Rezanoff, A. Tracey, E. Devaney, M. Berriman, N.  
688 Sargison, J. A. Cotton, J. S. Gilleard, Population genomic and evolutionary modelling  
689 analyses reveal a single major QTL for ivermectin drug resistance in the pathogenic  
690 nematode, *Haemonchus contortus*. *BMC Genomics.* **20**, 218 (2019).
- 691 35. M. S. G. Kwa, J. G. Veenstra, M. H. Roos, Benzimidazole resistance in *Haemonchus*  
692 *contortus* is correlated with a conserved mutation at amino acid 200 in  $\beta$ -tubulin  
693 isotype 1. *Molecular and Biochemical Parasitology.* **63**, 299–303 (1994).
- 694 36. R. W. Avramenko, E. M. Redman, L. Melville, Y. Bartley, J. Wit, C. Queiroz, D. J.  
695 Bartley, J. S. Gilleard, Deep amplicon sequencing as a powerful new tool to screen for  
696 sequence polymorphisms associated with anthelmintic resistance in parasitic  
697 nematode populations. *Int. J. Parasitol.* **49**, 13–26 (2019).
- 698 37. G. I. Saunders, J. D. Wasmuth, R. Beech, R. Laing, M. Hunt, H. Naghra, J. A. Cotton,  
699 M. Berriman, C. Britton, J. S. Gilleard, Characterization and comparative analysis of the  
700 complete *Haemonchus contortus*  $\beta$ -tubulin gene family and implications for  
701 benzimidazole resistance in strongylid nematodes. *Int. J. Parasitol.* **43**, 465–475 (2013).
- 702 38. M. de Lourdes Mottier, R. K. Prichard, Genetic analysis of a relationship between  
703 macrocyclic lactone and benzimidazole anthelmintic selection on *Haemonchus*  
704 *contortus*. *Pharmacogenet. Genomics.* **18**, 129–140 (2008).
- 705 39. J. K. L. Eng, W. J. Blackhall, M. Y. Osei-Atweneboana, C. Bourguinat, D. Galazzo, R. N.  
706 Beech, T. R. Unnasch, K. Awadzi, G. W. Lubega, R. K. Prichard, Ivermectin selection  
707 on beta-tubulin: evidence in *Onchocerca volvulus* and *Haemonchus contortus*. *Mol.*  
708 *Biochem. Parasitol.* **150**, 229–235 (2006).
- 709 40. J. M. L. dos Santos, J. M. L. dos Santos, J. F. Vasconcelos, G. A. Frota, W. L. C.  
710 Ribeiro, W. P. P. André, L. da Silva Vieira, M. Teixeira, C. M. L. Bevilaqua, J. P.  
711 Monteiro, *Haemonchus contortus*  $\beta$ -tubulin isotype 1 gene F200Y and F167Y SNPs are  
712 both selected by ivermectin and oxfendazole treatments with differing impacts on  
713 anthelmintic resistance. *Veterinary Parasitology.* **248**, 90–95 (2017).
- 714 41. M. Y. Osei-Atweneboana, D. A. Boakye, K. Awadzi, J. O. Gyapong, R. K. Prichard,  
715 Genotypic analysis of  $\beta$ -tubulin in *Onchocerca volvulus* from communities and  
716 individuals showing poor parasitological response to ivermectin treatment. *Int. J.*  
717 *Parasitol. Drugs Drug Resist.* **2**, 20–28 (2012).

- 718 42. R. J. Martin, A. P. Robertson, S. K. Buxton, R. N. Beech, C. L. Charvet, C. Neveu,  
719 Levamisole receptors: a second awakening. *Trends Parasitol.* **28**, 289–296 (2012).
- 720 43. J. T. Fleming, M. D. Squire, T. M. Barnes, C. Tornøe, K. Matsuda, J. Ahnn, A. Fire, J. E.  
721 Sulston, E. A. Barnard, D. B. Sattelle, J. A. Lewis, *Caenorhabditis elegans* levamisole  
722 resistance genes *lev-1*, *unc-29*, and *unc-38* encode functional nicotinic acetylcholine  
723 receptor subunits. *J. Neurosci.* **17**, 5843–5857 (1997).
- 724 44. A. Fauvin, C. Charvet, M. Issouf, J. Cortet, J. Cabaret, C. Neveu, cDNA-AFLP analysis  
725 in levamisole-resistant *Haemonchus contortus* reveals alternative splicing in a nicotinic  
726 acetylcholine receptor subunit. *Molecular and Biochemical Parasitology.* **170**, 105–107  
727 (2010).
- 728 45. V. Barrère, R. N. Beech, C. L. Charvet, R. K. Prichard, Novel assay for the detection  
729 and monitoring of levamisole resistance in *Haemonchus contortus*. *Int. J. Parasitol.* **44**,  
730 235–241 (2014).
- 731 46. Y.-J. Choi, S. A. Bisset, S. R. Doyle, K. Hallsworth-Pepin, J. Martin, W. N. Grant, M.  
732 Mitreva, Genomic introgression mapping of field-derived multiple-anthelmintic  
733 resistance in *Teladorsagia circumcincta*. *PLoS Genet.* **13**, e1006857 (2017).
- 734 47. G. Hernando, I. Bergé, D. Rayes, C. Bouzat, Contribution of subunits to *Caenorhabditis*  
735 *elegans* levamisole-sensitive nicotinic receptor function. *Mol. Pharmacol.* **82**, 550–560  
736 (2012).
- 737 48. A. Blanchard, F. Guégnard, C. L. Charvet, A. Crisford, E. Courtot, C. Sauvé, A.  
738 Harmache, T. Duguet, V. O’Connor, P. Castagnone-Sereno, B. Reaves, A. J.  
739 Wolstenholme, R. N. Beech, L. Holden-Dye, C. Neveu, Deciphering the molecular  
740 determinants of cholinergic anthelmintic sensitivity in nematodes: When novel  
741 functional validation approaches highlight major differences between the model  
742 *Caenorhabditis elegans* and parasitic species. *PLoS Pathog.* **14**, e1006996 (2018).
- 743 49. D. K. Williams, C. Stokes, N. A. Horenstein, R. L. Papke, Differential regulation of  
744 receptor activation and agonist selectivity by highly conserved tryptophans in the  
745 nicotinic acetylcholine receptor binding site. *J. Pharmacol. Exp. Ther.* **330**, 40–53  
746 (2009).
- 747 50. T. Lynagh, S. A. Pless, Principles of agonist recognition in Cys-loop receptors. *Front.*  
748 *Physiol.* **5**, 160 (2014).
- 749 51. D. Rayes, M. J. De Rosa, M. Bartos, C. Bouzat, Molecular basis of the differential  
750 sensitivity of nematode and mammalian muscle to the anthelmintic agent levamisole. *J.*  
751 *Biol. Chem.* **279**, 36372–36381 (2004).
- 752 52. H. Kong, J. Boulter, J. L. Weber, C. Lai, M. V. Chao, An evolutionarily conserved  
753 transmembrane protein that is a novel downstream target of neurotrophin and ephrin  
754 receptors. *J. Neurosci.* **21**, 176–185 (2001).
- 755 53. S. Luo, Y. Chen, K.-O. Lai, J. C. Arévalo, S. C. Froehner, M. E. Adams, M. V. Chao, N.

- 756 Y. Ip,  $\alpha$ -Syntrophin regulates ARMS localization at the neuromuscular junction and  
757 enhances EphA4 signaling in an ARMS-dependent manner. *Journal of Cell Biology*. **169**  
758 (2005), pp. 813–824.
- 759 54. S. M. Williamson, B. Storey, S. Howell, K. M. Harper, R. M. Kaplan, A. J.  
760 Wolstenholme, Candidate anthelmintic resistance-associated gene expression and  
761 sequence polymorphisms in a triple-resistant field isolate of *Haemonchus contortus*.  
762 *Mol. Biochem. Parasitol.* **180**, 99–105 (2011).
- 763 55. N. Unwin, Y. Fujiyoshi, Gating movement of acetylcholine receptor caught by plunge-  
764 freezing. *J. Mol. Biol.* **422**, 617–634 (2012).
- 765 56. E. Redman, N. Sargison, F. Whitelaw, F. Jackson, A. Morrison, D. J. Bartley, J. S.  
766 Gilleard, Introgression of ivermectin resistance genes into a susceptible *Haemonchus*  
767 *contortus* strain by multiple backcrossing. *PLoS Pathog.* **8**, e1002534 (2012).
- 768 57. S. R. Doyle, R. Laing, D. J. Bartley, C. Britton, U. Chaudhry, J. S. Gilleard, N. Holroyd,  
769 B. K. Mable, K. Maitland, A. A. Morrison, A. Tait, A. Tracey, M. Berriman, E. Devaney, J.  
770 A. Cotton, N. D. Sargison, A genome resequencing-based genetic map reveals the  
771 recombination landscape of an outbred parasitic nematode in the presence of  
772 polyploidy and polyandry. *Genome Biol. Evol.* **10**, 396–409 (2018).
- 773 58. J. A. Dent, M. W. Davis, L. Avery, *avr-15* encodes a chloride channel subunit that  
774 mediates inhibitory glutamatergic neurotransmission and ivermectin sensitivity in  
775 *Caenorhabditis elegans*. *EMBO J.* **16**, 5867–5879 (1997).
- 776 59. I. Spiegel, A. R. Mardinly, H. W. Gabel, J. E. Bazinet, C. H. Couch, C. P. Tzeng, D. A.  
777 Harmin, M. E. Greenberg, *Npas4* regulates excitatory-inhibitory balance within neural  
778 circuits through cell-type-specific gene programs. *Cell.* **157**, 1216–1229 (2014).
- 779 60. Y. Lin, B. L. Bloodgood, J. L. Hauser, A. D. Lapan, A. C. Koon, T.-K. Kim, L. S. Hu, A.  
780 N. Malik, M. E. Greenberg, Activity-dependent regulation of inhibitory synapse  
781 development by *Npas4*. *Nature.* **455**, 1198–1204 (2008).
- 782 61. A. M. Rezansoff, R. Laing, J. S. Gilleard, Evidence from two independent backcross  
783 experiments supports genetic linkage of microsatellite *Hcms8a20*, but not other  
784 candidate loci, to a major ivermectin resistance locus in *Haemonchus contortus*. *Int. J.*  
785 *Parasitol.* **46**, 653–661 (2016).
- 786 62. K. S. Evans, J. Wit, L. Stevens, S. R. Hahnel, B. Rodriguez, G. Park, M. Zamanian, S. C.  
787 Brady, E. Chao, K. Introcaso, R. E. Tanny, E. C. Andersen, Two novel loci underlie  
788 natural differences in *Caenorhabditis elegans* abamectin responses. *PLoS Pathog.* **17**,  
789 e1009297 (2021).
- 790 63. J. Wit, C. M. Dilks, E. C. Andersen, Complementary approaches with free-living and  
791 parasitic nematodes to understanding anthelmintic resistance. *Trends Parasitol.* **37**,  
792 240–250 (2021).
- 793 64. A. Streit, Opinion: What do rescue experiments with heterologous proteins tell us and

- 794 what not? *Parasitol. Res.* (2021), doi:10.1007/s00436-021-07247-z.
- 795 65. R. Laing, V. Gillan, E. Devaney, Ivermectin – Old Drug, New Tricks? *Trends in*  
796 *Parasitology*. **33** (2017), pp. 463–472.
- 797 66. R. Ghosh, E. C. Andersen, J. A. Shapiro, J. P. Gerke, L. Kruglyak, Natural variation in a  
798 chloride channel subunit confers avermectin resistance in *C. elegans*. *Science*. **335**,  
799 574–578 (2012).
- 800 67. A. P. Gerhard, J. Krücken, C. Neveu, C. L. Charvet, A. Harmache, G. von Samson-  
801 Himmelstjerna, Pharyngeal pumping and tissue-specific transgenic P-Glycoprotein  
802 expression influence macrocyclic lactone susceptibility in *Caenorhabditis elegans*.  
803 *Pharmaceuticals*. **14** (2021), doi:10.3390/ph14020153.
- 804 68. S. R. Doyle, G. Sankaranarayanan, F. Allan, D. Berger, P. D. Jimenez Castro, J. B.  
805 Collins, T. Crellen, M. A. Duque-Correa, P. Ellis, T. G. Jaleta, R. Laing, K. Maitland, C.  
806 McCarthy, T. Moundai, B. Softley, E. Thiele, P. T. Ouakou, J. V. Tushabe, J. P.  
807 Webster, A. J. Weiss, J. Lok, E. Devaney, R. M. Kaplan, J. A. Cotton, M. Berriman, N.  
808 Holroyd, Evaluation of DNA extraction methods on individual helminth egg and larval  
809 stages for whole-genome sequencing. *Front. Genet.* **10**, 826 (2019).
- 810 69. S. Sun, C. Roedelsperger, R. J. Sommer, Single worm transcriptomics identifies a  
811 developmental core network of oscillating genes with deep conservation across  
812 nematodes. *Genome Res.* (2021), doi:10.1101/gr.275303.121.
- 813 70. C. L. Diaz Soria, J. Lee, T. Chong, A. Coghlan, A. Tracey, M. D. Young, T. Andrews, C.  
814 Hall, B. L. Ng, K. Rawlinson, S. R. Doyle, S. Leonard, Z. Lu, H. M. Bennett, G. Rinaldi,  
815 P. A. Newmark, M. Berriman, Single-cell atlas of the first intra-mammalian  
816 developmental stage of the human parasite *Schistosoma mansoni*. *Nat. Commun.* **11**,  
817 6411 (2020).

818 **Acknowledgements:**

819 This work was supported by the Biotechnology and Biological Sciences Research  
820 Council (BBSRC) [BB/M003949]; the Scottish Government's Rural and Environment  
821 Science and Analytical Services (RESAS) division; a University of Glasgow James  
822 Herriot Scholarship; the Wellcome Trust [206194 and 216614/Z/19/Z]; and UKRI  
823 [MR/T020733/1]. For the purpose of Open Access, the authors have applied a CC  
824 BY public copyright licence to any Author Accepted Manuscript version arising from  
825 this submission.

826 We would like to acknowledge members of the BUG Consortium and Parasite  
827 Genomics group at the Wellcome Sanger Institute for insightful discussions  
828 throughout this project. We also thank Pathogen Informatics and DNA Pipelines  
829 (WSI) for their support and expertise and the Biosciences Division at the Moredun  
830 Research Institute for expert care and animal assistance.

831

832 **Funding:**

833 Biotechnology and Biological Sciences Research Council (BBSRC; BB/M003949)  
834 (RL, MB, ED, JAC, NS, BM, DB, CB).

835 Wellcome Trust's core funding of the Wellcome Sanger Institute (grant WT206194)  
836 (MB).

837 University of Glasgow James Herriot Scholarship (AA).

838 Wellcome Clinical Research Career Development Fellowship (216614/Z/19/Z) (RL).

839 UKRI Future Leaders Fellowship (MR/T020733/1) (SRD).

840

841 **Author contributions:**

842 Conceptualisation: RL, AT, ED, JAC

843 Investigation: SRD, RL, DB, AM, KM, AA, CB, UC, IF, JM

844 Formal analysis: SRD, RL

845 Software: SRD

846 Resources: DB, AM, RK, NS

847 Supervision: CB, JSG, NS, MB, ED, JAC

848 Project administration: NH, ED

849 Writing - Original Draft: SRD, JAC, RL, ED

850 Writing - Review & Editing: All authors

851 Funding acquisition: RL, AT, MB, ED, JAC, NS, BM, DB, CB, SRD.



852

853 **Competing interests:**

854 Authors declare that they have no competing interests.

855

856 **Data and materials availability:**

857 Raw sequencing data for this study are outlined in **table S1** and are archived under  
858 the ENA study accession PRJEB4207. The *H. contortus* genome assembly and  
859 manually curated annotation resources are publicly available at

860 [https://parasite.wormbase.org/Haemonchus\\_contortus\\_prjeb506/Info/Index/](https://parasite.wormbase.org/Haemonchus_contortus_prjeb506/Info/Index/). The  
861 code used to generate and analyse data and to plot figures can be found at  
862 [https://github.com/stephenrdoyle/hcontortus\\_X-QTL](https://github.com/stephenrdoyle/hcontortus_X-QTL).

863

864 **Supplementary Materials**

865 Materials and Methods

866 Supplementary Text

867 Figs. S1 to S10

868 Tables S1 to S2
